# Supplementary material
Source: publisher figshare collection journal article supplement (https://tandf.figshare.com/ndownloader/files/17796863)
Supplement: Supplementary file [file 17796863]

## Supplementary data

Table 3. Mean clinical outcome scores with 95% confidence intervals

| Factor               | MBT         | APT        |
|----------------------|-------------|------------|
| <b>KSS Knee</b>      |             |            |
| Preoperative         | 46 (43–50)  | 44 (42–46) |
| 3 months             | 93 (91–95)  | 86 (81–91) |
| 12 months            | 93 (90–96)  | 94 (90–97) |
| 24 months            | 98 (96–100) | 95 (90–99) |
| <b>KSS Function</b>  |             |            |
| Preoperative         | 54 (49–59)  | 52 (47–58) |
| 3 months             | 73 (68–78)  | 76 (71–82) |
| 12 months            | 85 (80–90)  | 85 (80–90) |
| 24 months            | 88 (83–93)  | 82 (77–88) |
| <b>KOOS Symptoms</b> |             |            |
| Preoperative         | 47 (41–53)  | 49 (42–55) |
| 3 months             | 67 (61–73)  | 62 (56–68) |
| 12 months            | 77 (71–83)  | 72 (66–79) |
| 24 months            | 80 (73–86)  | 75 (68–82) |
| <b>KOOS Pain</b>     |             |            |
| Preoperative         | 38 (31–45)  | 41 (34–48) |
| 3 months             | 70 (63–77)  | 66 (59–73) |
| 12 months            | 82 (75–88)  | 80 (73–87) |
| 24 months            | 87 (80–94)  | 79 (72–86) |
| <b>KOOS ADL</b>      |             |            |
| Preoperative         | 42 (35–48)  | 45 (38–52) |
| 3 months             | 75 (68–81)  | 67 (61–74) |
| 12 months            | 80 (73–86)  | 75 (68–82) |
| 24 months            | 82 (75–89)  | 75 (68–82) |
| <b>KOOS Sports</b>   |             |            |
| Preoperative         | 9 (5–13)    | 12 (8–17)  |
| 3 months             | 35 (26–44)  | 21 (14–29) |
| 12 months            | 42 (33–52)  | 40 (30–50) |
| 24 months            | 42 (35–50)  | 40 (29–50) |
| <b>KOOS QoL</b>      |             |            |
| Preoperative         | 33 (27–38)  | 35 (30–40) |
| 3 months             | 46 (41–51)  | 43 (38–48) |
| 12 months            | 55 (50–60)  | 53 (48–58) |
| 24 months            | 54 (49–60)  | 53 (48–59) |
| <b>FJS</b>           |             |            |
| 3 months             | 36 (25–46)  | 35 (24–46) |
| 12 months            | 61 (50–72)  | 56 (45–67) |
| 24 months            | 58 (47–69)  | 51 (40–63) |

KSS = Knee Society Score, KOOS = Knee Osteoarthritis Outcome Score, ADL = activities of daily living, QoL = quality of life, FJS = forgotten joint score.

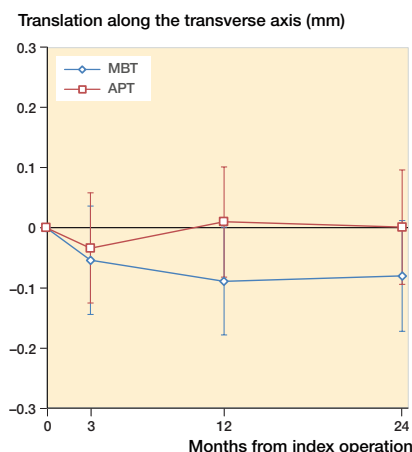

Figure 6. Mean translation along the transversal axis in mm with 95% confidence intervals. A positive value indicates medial translation and a negative value indicates lateral translation of the tibial implant.

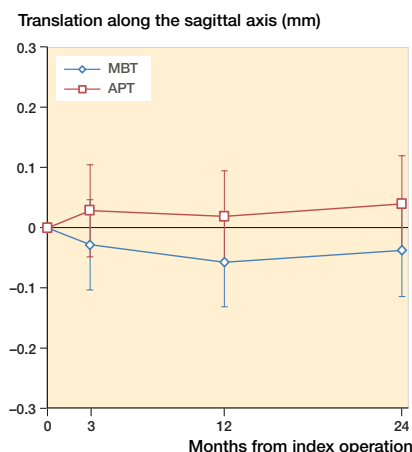

Figure 7. Mean translation along the sagittal axis in mm with 95% confidence intervals. A positive value indicates anterior translation and a negative value indicates posterior translation of the tibial implant.

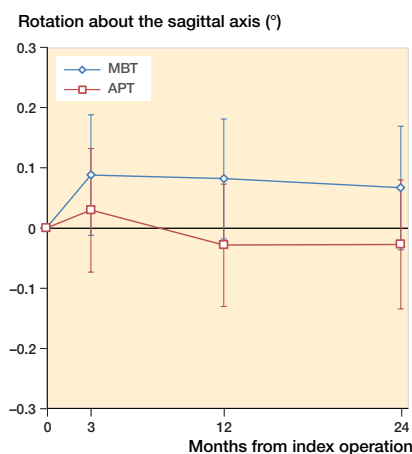

Figure 8. Mean rotation along the sagittal axis in degrees with 95% confidence intervals. A positive value indicates medial tilting and a negative value indicates lateral tilting of the tibial implant.
